# Supplementary material for: Gallic Acid Mitigates 5-Hydroxymethylfurfural Formation while Enhancing or Preserving Browning and Antioxidant Activity Development in Glucose/Arginine and Sucrose/Arginine Maillard Model Systems
Source: MDPI journal article supplement (doi:10.3390/molecules27030848), 2022-01-27
Supplement: s1 [file s1]

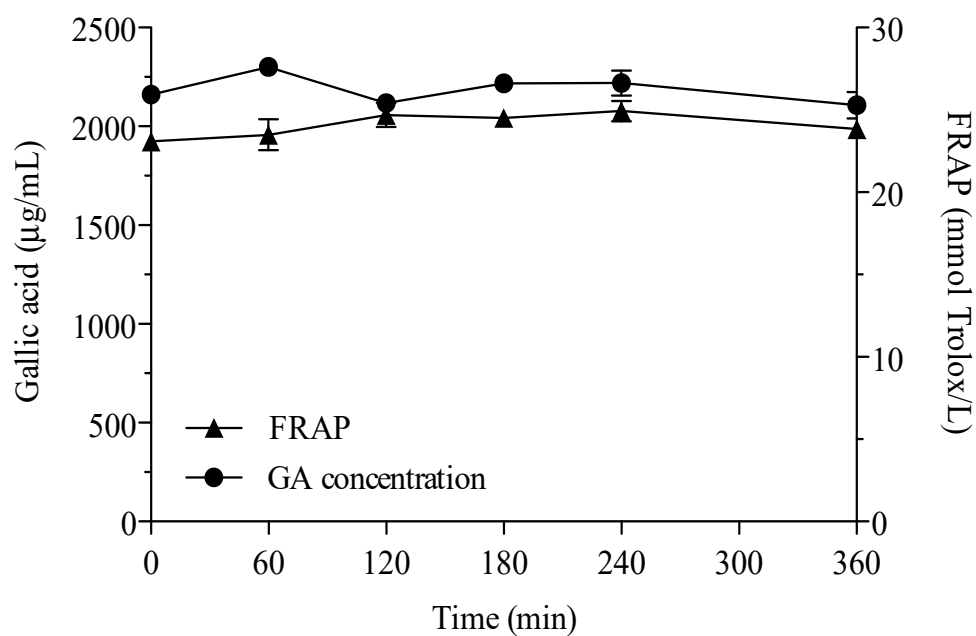

**Supplementary Figure S1.** Neither GA concentration (●) nor its antioxidant activity measured by FRAP assay (▲) changed in the blank system after 360 min ( $p > 0.05$ , ANOVA followed by Tukey's *post hoc* test). The blank system was prepared by heating a gallic acid solution under the same conditions used for model systems.
